# Supplementary material
Source: publisher figshare collection journal article supplement (https://frontiersin.figshare.com/ndownloader/files/21415359)
Supplement: Supplementary file [file 21415359]

# Supplementary Figure

## **A proteotranscriptomic-based computational drug-repositioning method for Alzheimer's disease**

**Soo Youn Lee<sup>1#</sup>, Min-Young Song<sup>1#</sup>, Dain Kim<sup>1</sup>, Chaewon Park<sup>1</sup>, Da Kyeong Park<sup>1</sup>, Dong Geun Kim<sup>1,2</sup>, Jong Shin Yoo<sup>1,2\*</sup> and Young Hye Kim<sup>1\*</sup>**

<sup>1</sup> Research Center for Bioconvergence Analysis, Korea Basic Science Institute, Cheongju, Chungbuk, 28119, Republic of Korea

<sup>2</sup> Graduated School of Analytical Science and Technology, Chungnam National University, Daejeon, 34134, Re-public of Korea

**# Equal contribution**

**\* Correspondence:**

Corresponding Author  
E-mail: yhkim74@kbsi.re.kr (Kim YH)

### **Contents**

**Supplementary Figure 1.** Workflow of selecting molecular signature expression profiles from CMap, L1000, and TCGA used to construct DGPSD.

**Supplementary Figure 2.** The results of compound name standardization. (A-B) Number of compounds with CID.

**Supplementary Figure 3.** Data composition of DGPSD.

**Supplementary Figure 4.** Data composition of cancer and AD gene expression profiles.

**Supplementary Figure 5.** The proportion of genes which had the same expression pattern in AD and nine cancer and named SEPG (Same Expressed Pattern Gene).

**Supplementary Figure 6.** The shared gene PPI network between AD and GBM.

**A**

| CMap                     |       |
|--------------------------|-------|
| Gene expression profiles | 7,559 |
| Compounds                | 1,310 |
| Cell lines               | 5     |

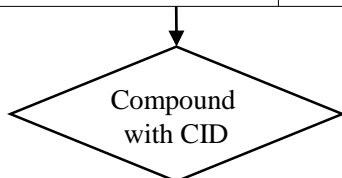

| L1000                    |        |
|--------------------------|--------|
| Gene expression profiles | 66,612 |
| Compounds                | 711    |
| Cell lines               | 24     |

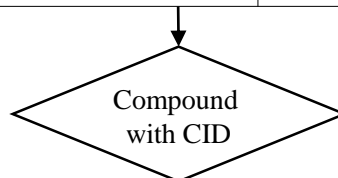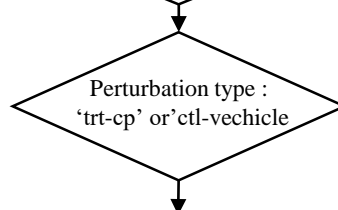

Calculate log2 fold change between control and perturbation profiles in the same cell line

| Drug-induced Gene Perturbation Signature Database(DGPSD) |        |
|----------------------------------------------------------|--------|
| Drug-induced Gene Perturbation Signature (DGPS)          | 61,019 |
| Compounds                                                | 1,520  |
| Cell lines                                               | 26     |

**B**

| TCGA                     |       |
|--------------------------|-------|
| Gene expression profiles | 4,948 |
| Drugs                    | 159   |

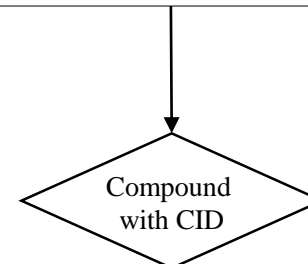

Compute differential express genes using GLM model (adjusted p-value<0.05)

| TCGA                                              |     |
|---------------------------------------------------|-----|
| Cancer-induced Gene Perturbation Signature (CGPS) | 9   |
| Drugs                                             | 159 |

**Supplementary Figure 1.** Workflow of selecting molecular signature expression profiles from CMap, L1000, and TCGA used to construct DPGSD. The detailed method is described in the Methods section.

**A**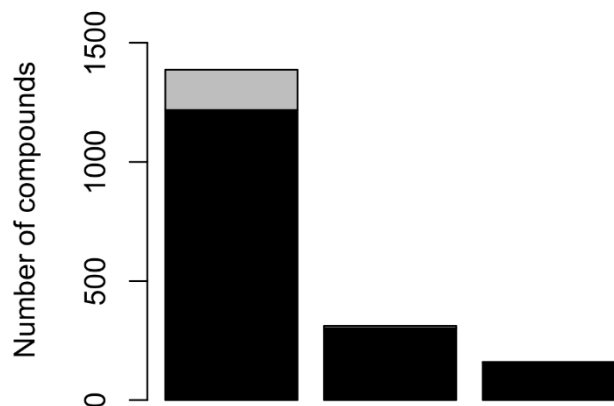

|             | CMap | L1000 | TCGA | Sub-Total |
|-------------|------|-------|------|-----------|
| with CID    | 1218 | 302   | 158  | 1678      |
| Without CID | 169  | 10    | 1    | 180       |
| Total       | 1387 | 312   | 159  | 1858      |

**B**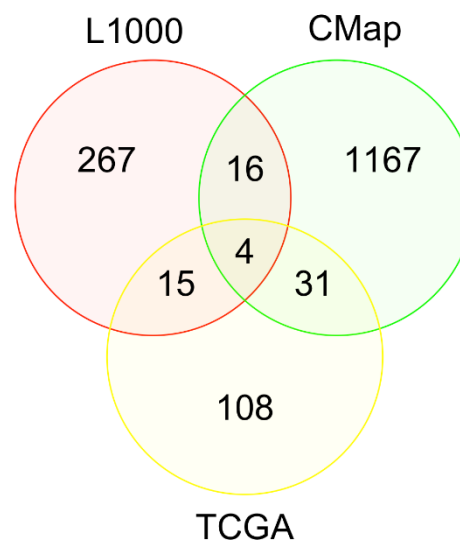

**Supplementary Figure 2.** The results of compound name standardization. **(A-B)** Number of compounds with CID.

**A**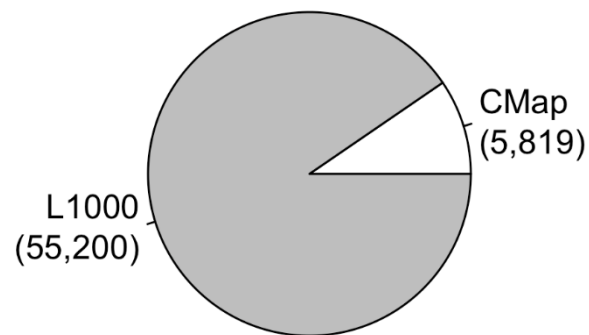**B**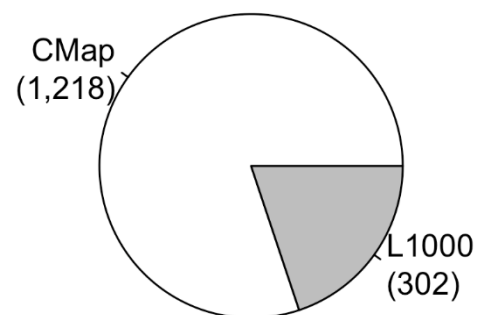**C**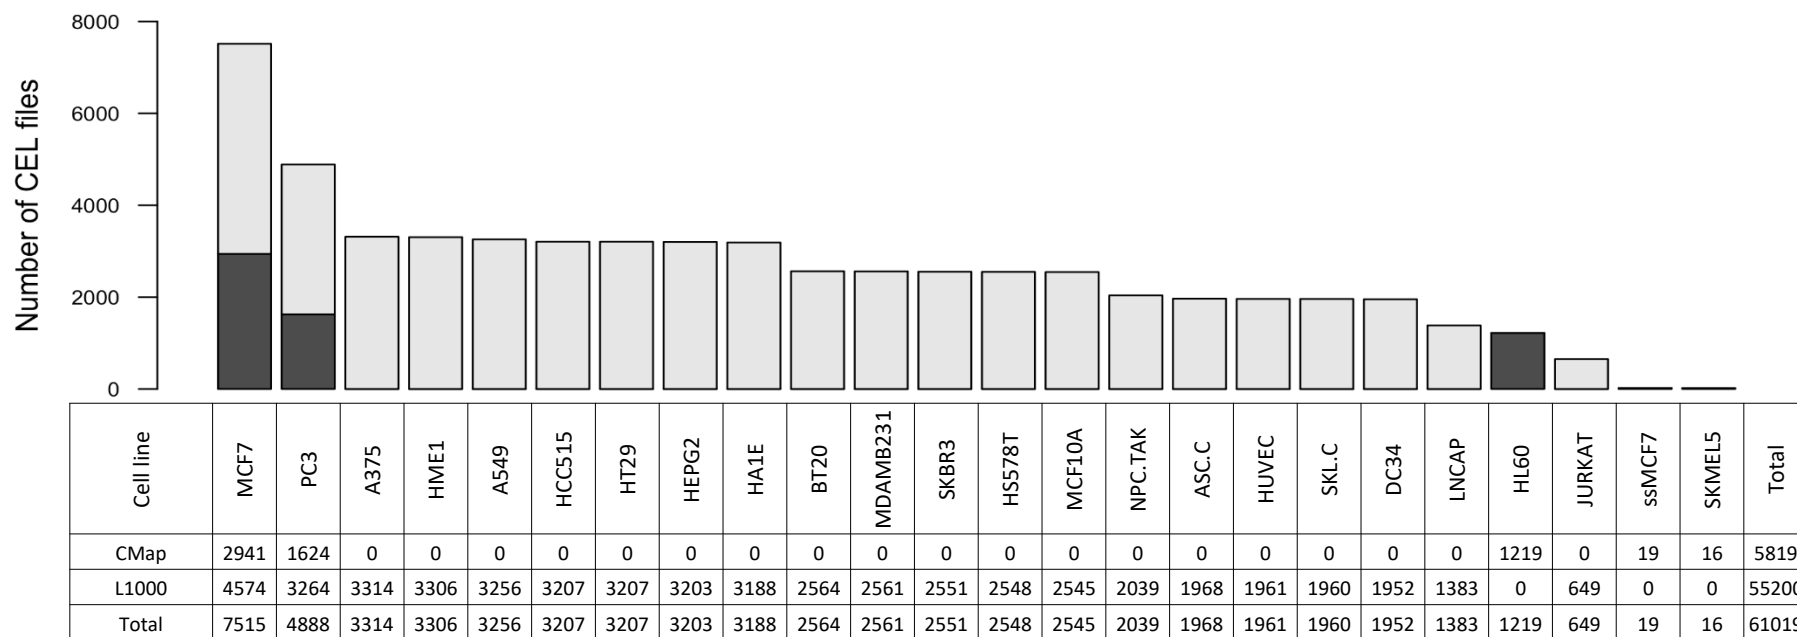

**Supplementary Figure 3.** Data composition of DGPSPD. Number of CEL files(A), Compounds(B), CEL files per each cell line(C) in DGPSPD.

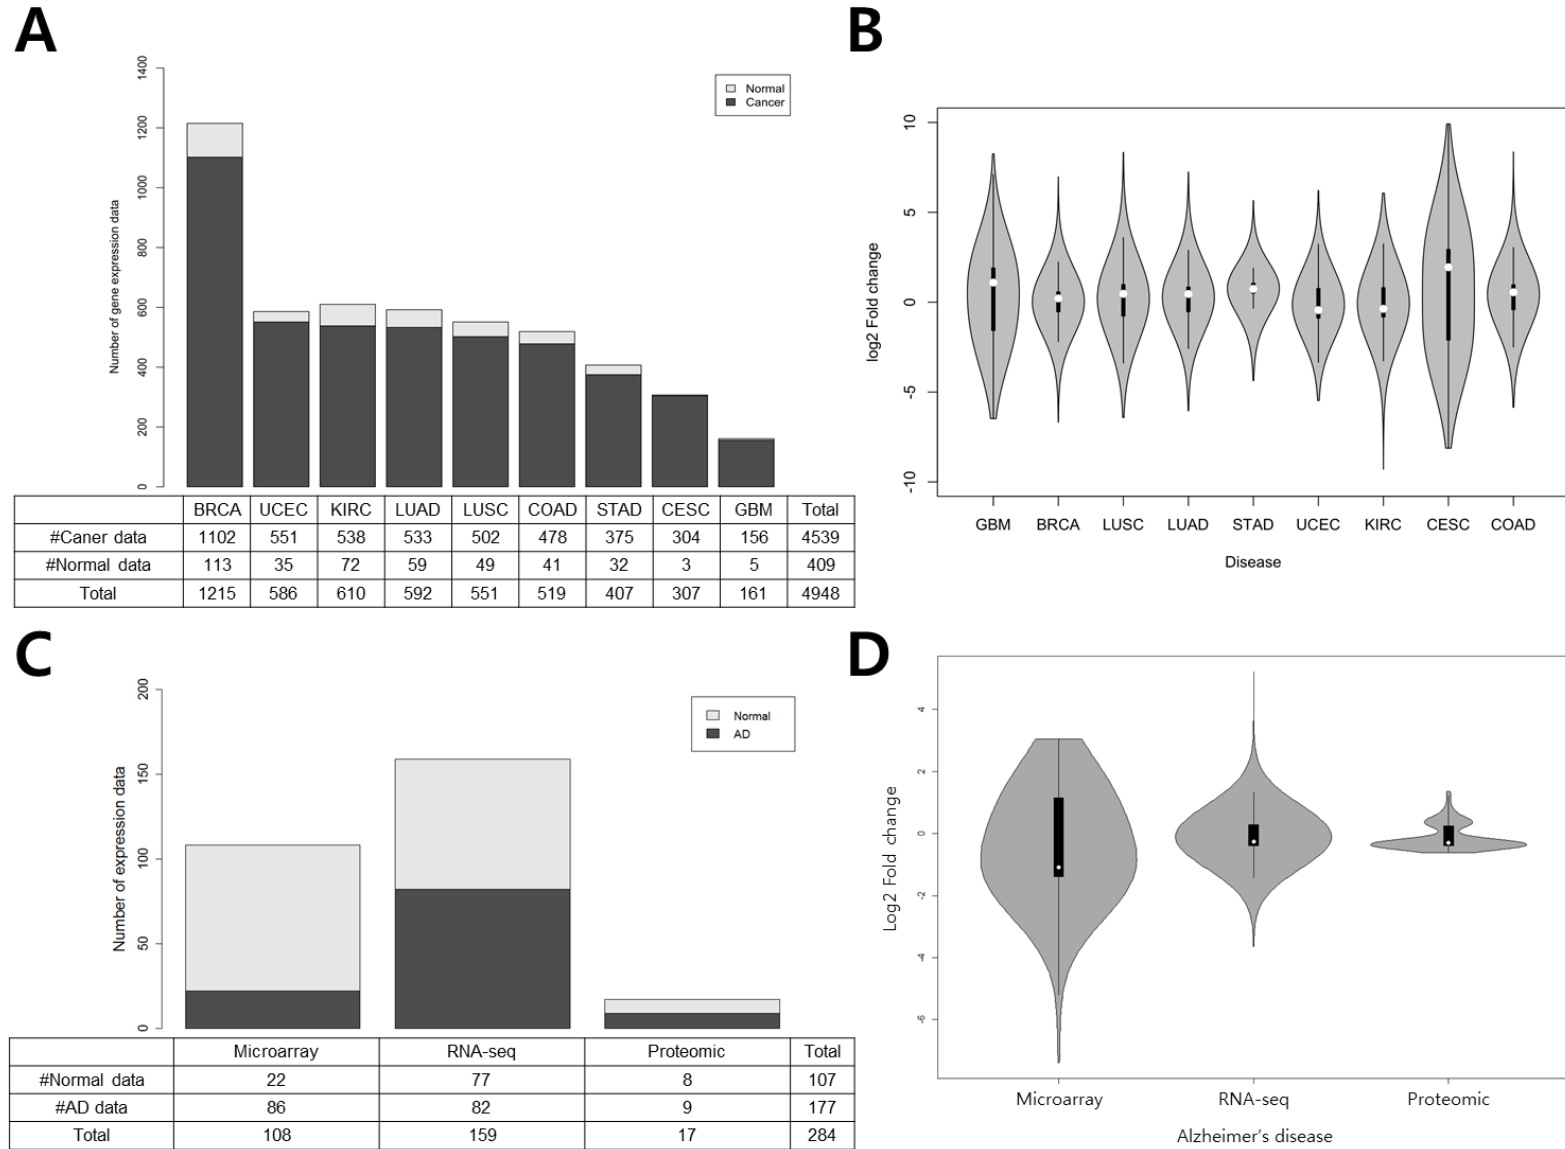

**Supplementary Figure 4.** Data composition of cancer and AD gene expression profiles. **(A)** Number of gene expression profiles for nine cancers from TCGA. **(B)** Log2 fold change distribution per cancer. **(C)** Number of molecular signature expression profiles per multi-omic data type. **(D)** Log2 fold change distribution per multi-omic data type.

**A**

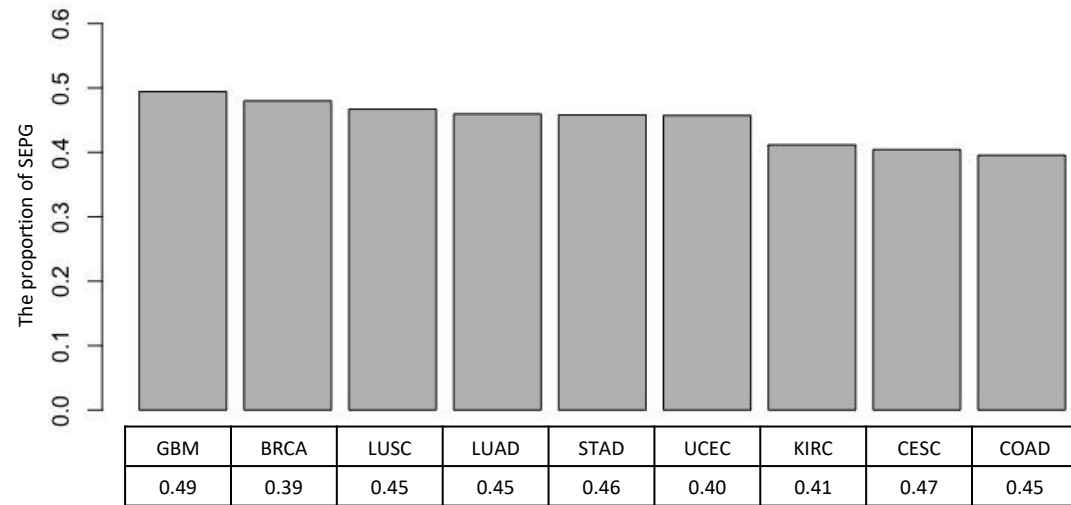

**Supplementary Figure 5.** The proportion of genes which had the same expression pattern in AD and nine cancer and named SEPG (Same Expressed Pattern Gene).

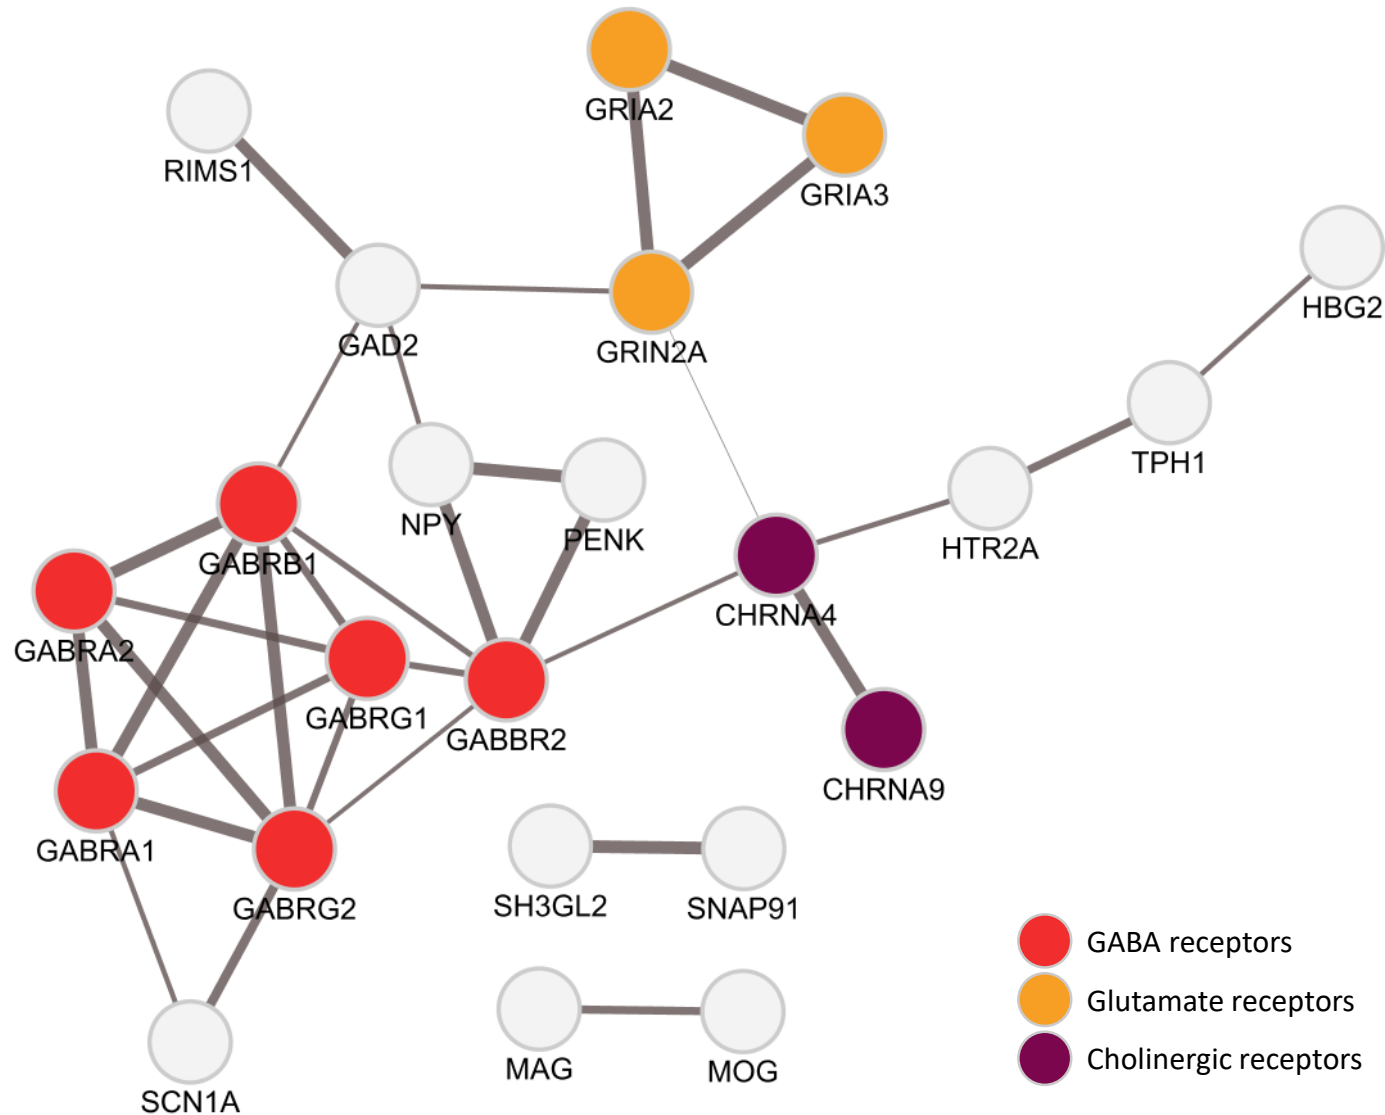

**Supplementary Figure 6.** The shared gene PPI network between AD and GBM. The degree of thickness denotes confidence score range (0.4 to 0.9). A thicker line indicates a higher confidence score (0.9). The red, orange and purple circles denote GABA, Glutamate, and Cholinergic receptor family proteins, respectively.
